# Supplementary material
Source: ML conference proceedings conference paper supplement (https://openaccess.thecvf.com/content/WACV2025/html/Tiwari_LIPIDS_Learning-Based_Illumination_WACV_2025_paper.html)
Supplement: Supplementary file 1 [file Tiwari_LIPIDS_Learning-Based_Illumination_WACV_2025_supplemental.pdf]

# LIPIDS: Learning-based Illumination Planning In Discretized (Light) Space for Photometric Stereo (Supplementary)

Ashish Tiwari, Mihirkumar Sutariya, and Shanmuganathan Raman  
CVIG Lab, IIT Gandhinagar

{ashish.tiwari, sutariya.mihirkumar, shanmuga}@iitgn.ac.in

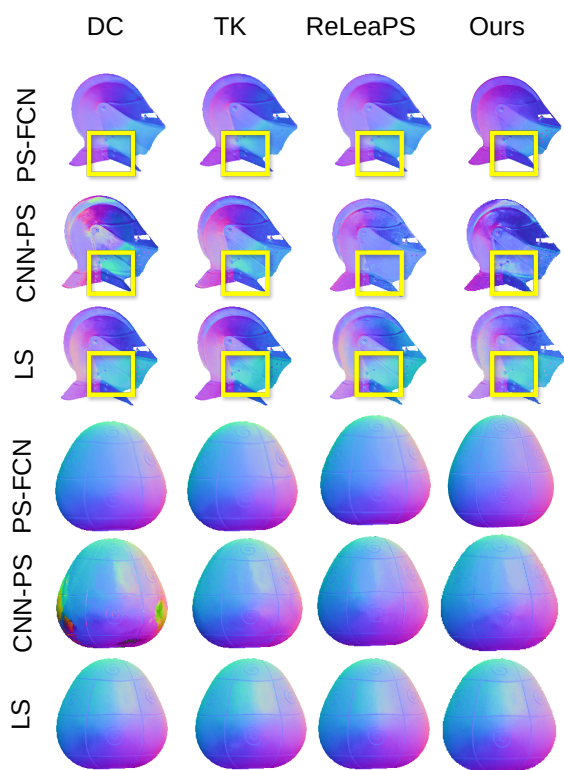

Figure 1. Qualitative comparison of variation of number of lights on the performance of different frameworks and different illumination planning methods over objects from Light Stage Data Gallery [2] and Gourd & Apple [1] datasets.

## References

- [1] Neil Alldrin, Todd Zickler, and David Kriegman. Photometric stereo with non-parametric and spatially-varying reflectance. In *2008 IEEE Conference on Computer Vision and Pattern Recognition*, pages 1–8. IEEE, 2008. 1
- [2] Paul Debevec. Relighting human locomotion. In *ACM SIGGRAPH 2006 Computer animation festival*, pages 263–es. 2006. 1, 3
- [3] Boxin Shi, Zhe Wu, Zhipeng Mo, Dinglong Duan, Sai-Kit Yeung, and Ping Tan. A benchmark dataset and evaluation for non-lambertian and uncalibrated photometric stereo. In *Proceedings of the IEEE Conference on Computer Vision and Pattern Recognition*, pages 3707–3716, 2016. 2, 4

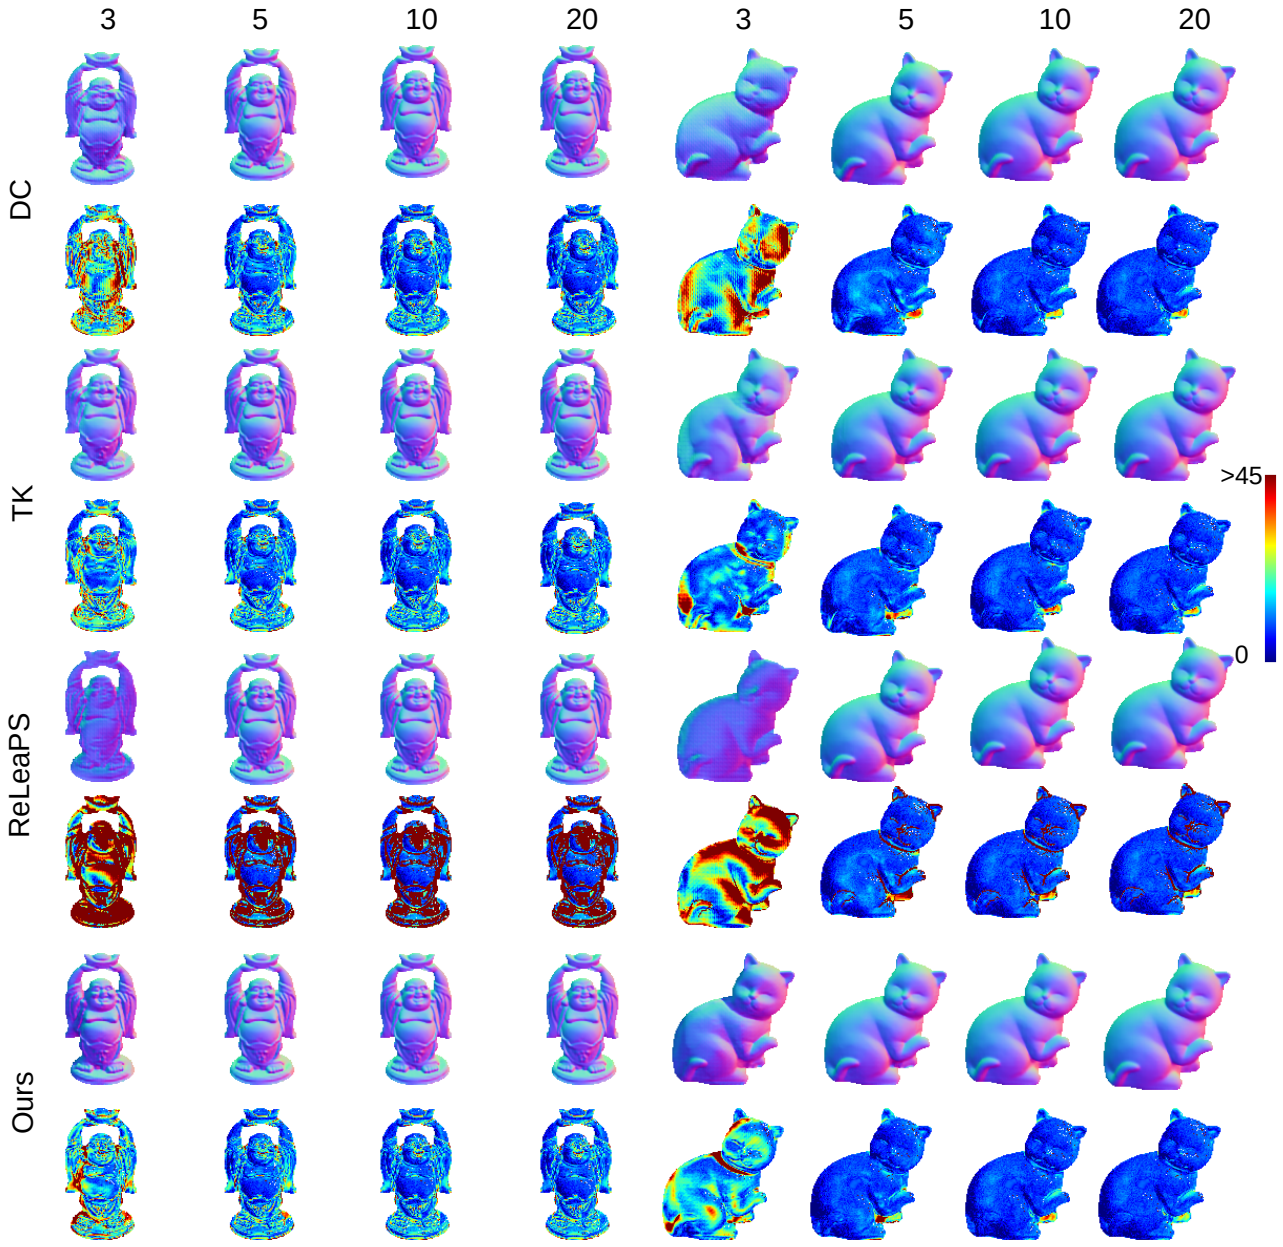

Figure 2. Qualitative comparison of variation of number of lights on the performance of different frameworks and different illumination planning methods over objects from the DiLiGenT dataset [3]

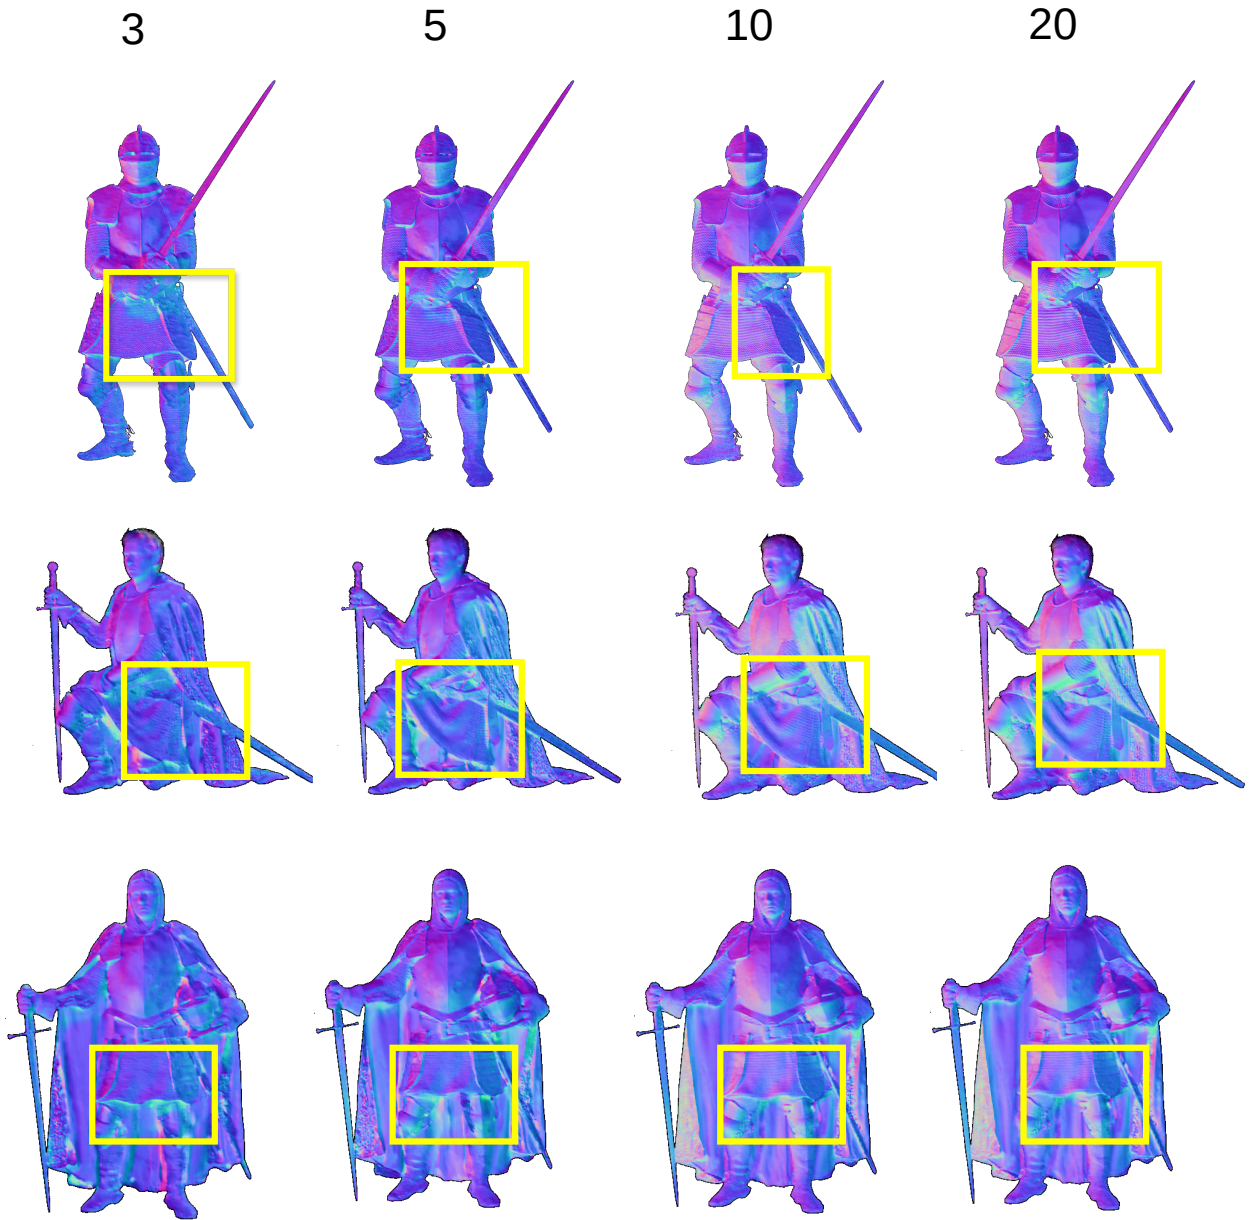

Figure 3. Qualitative comparison of variation of number of lights on the performance of LSNet + PS-FCN framework over objects from the Light Stage Data Gallery [2] dataset.

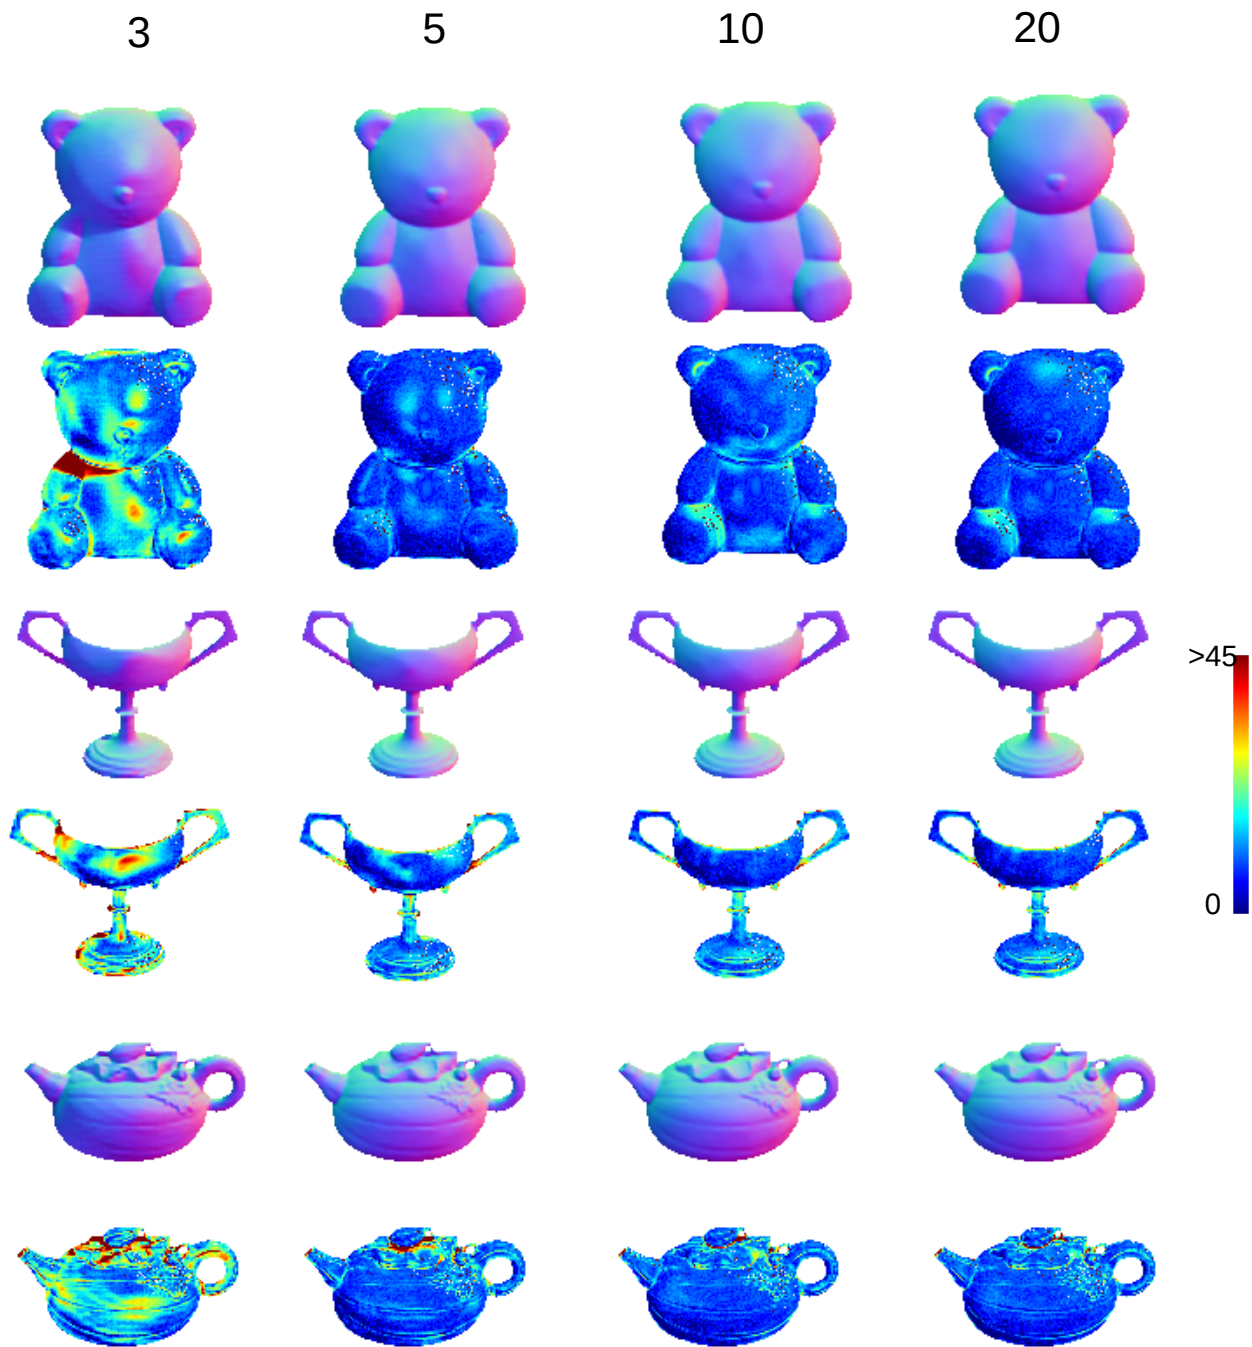

Figure 4. Qualitative comparison of variation of number of lights on the performance of LSNet + PS-FCN framework over objects from the DiLiGenT [3] dataset.
